# Supplementary material for: Novel polygonal structure Mn4+ activated In3+-based Elpasolite-type hexafluorides red phosphor for warm white light-emitting diodes (WLEDs)
Source: Royal Society of Chemistry journal article supplement (doi:10.1039/c8dt04690e), 2018-12-19
Supplement: c8dt04690e1.pdf [file c8dt04690e1.pdf]

## Electronic Supplementary Information (ESI)

### Novel polygonal structure $\text{Mn}^{4+}$ activated $\text{In}^{3+}$ -based Elpasolite-type hexafluorides red phosphor for warm white light-emitting diodes (WLEDs)

Feng Hong, Haiming Cheng, Chao Song, Guixia Liu\*, Wensheng Yu, Jinxian Wang, Xiangting Dong\*

Key Laboratory of Applied Chemistry and Nanotechnology at Universities of Jilin Province, Changchun University of Science and Technology, Changchun 130022. P. R. China

\*Corresponding author. Tel.: +86-431-85383815; Tel: +86-431-85582574

E-mail address: [liuguixia22@163.com](mailto:liuguixia22@163.com); [dongxiangting888@163.com](mailto:dongxiangting888@163.com).

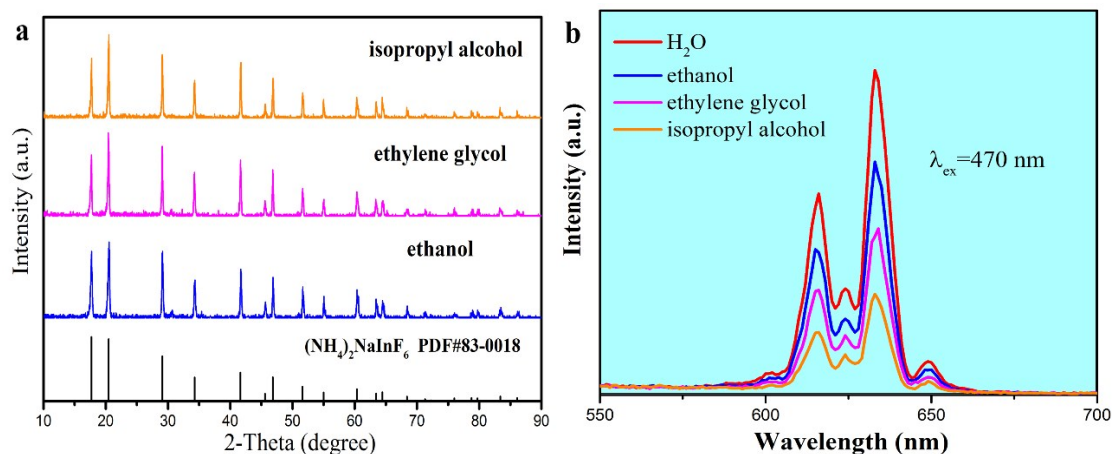

Fig. S1 XRD patterns (a) and fluorescence spectra ( $\lambda_{\text{ex}}=470$  nm) (b) of the  $(\text{NH}_4)_2\text{NaInF}_6:\text{Mn}^{4+}$  phosphors synthesized with different solvents.

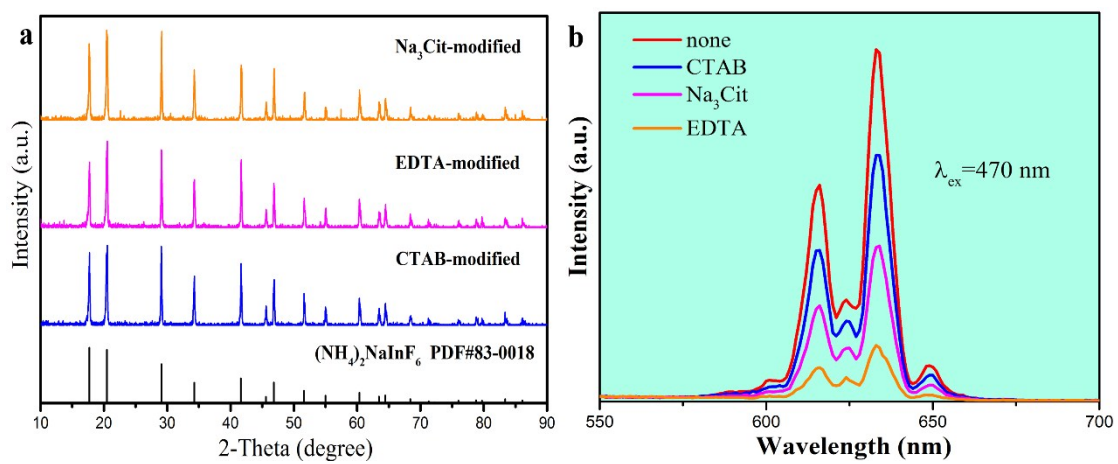

Fig. S2 XRD patterns (a) and fluorescence spectra ( $\lambda_{\text{ex}}=470$  nm) (b) of the  $(\text{NH}_4)_2\text{NaInF}_6:\text{Mn}^{4+}$  phosphors synthesized by different surfactants.
